# Supplementary material for: Dual RNA-Seq Analysis of Trichophyton rubrum and HaCat Keratinocyte Co-Culture Highlights Important Genes for Fungal-Host Interaction
Source: MDPI journal article supplement (doi:10.3390/genes9070362), 2018-07-19
Supplement: s1 [file s1]

**Supplementary Table S1.** General features of dual RNA-seq sequences against reference genomes.

| Sample       | Raw reads  | High-quality reads | <i>T. rubrum</i> reference genome (CBS 118892) |                  | Human reference genome (HG19) |                  |
|--------------|------------|--------------------|------------------------------------------------|------------------|-------------------------------|------------------|
|              |            |                    | Mapped reads                                   | Mapped reads (%) | Mapped reads                  | Mapped reads (%) |
| CBS I (PE)   | 60,462,551 | 59,066,317         | 47,766,930                                     | 80.87%           | -                             | -                |
| CBS II (SR)  | 37,501,479 | 36,676,227         | 31,692,446                                     | 86.41%           | -                             | -                |
| CBS III (SR) | 27,677,792 | 27,063,599         | 24,635,560                                     | 91.03%           | -                             | -                |
| CO I (PE)    | 50,412,147 | 48,758,632         | 351,062                                        | 0.72%            | 41,752,016                    | 85.63%           |
| CO II (SR)   | 27,926,550 | 27,331,638         | 2,571,234                                      | 9.41%            | 22,298,067                    | 81.58%           |
| CO III (SR)  | 25,574,109 | 25,063,089         | 1,388,085                                      | 5.54%            | 21,400,355                    | 85.39%           |
| H I (SR)     | 35,308,490 | 34,530,495         | -                                              | -                | 30,625,029                    | 88.69%           |
| H II (PE)    | 61,220,210 | 58,106,283         | -                                              | -                | 48,611,716                    | 83.66%           |
| H III (PE)   | 45,385,154 | 42,869,051         | -                                              | -                | 35,992,855                    | 83.96%           |

CBS I, CBS II, CBS III: *T. rubrum* libraries; CO I, CO II, CO III: co-culture libraries; H I, H II, H III: human keratinocyte libraries. The libraries were constructed in triplicate, with I, II and III corresponding to the sample number of each condition. PE: paired-end sequence; SR: single read sequence.
