# Supplementary material for: Dual RNA-Seq Analysis of Trichophyton rubrum and HaCat Keratinocyte Co-Culture Highlights Important Genes for Fungal-Host Interaction
Source: MDPI journal article supplement (doi:10.3390/genes9070362), 2018-07-19
Supplement: s1 [file s1]

**Supplementary Table S2.** Complete list of genes differentially expressed in keratinocytes after 24 h of co-culture.

| <b>ID</b> | <b>Gene product name</b>                          | <b>Log<sub>2</sub> fold change</b> |
|-----------|---------------------------------------------------|------------------------------------|
| SLC9A2    | Solute carrier family 9 member A2                 | 5.0                                |
| ANGPTL4   | Angiopoietin like 4                               | 4.7                                |
| DES       | Desmin                                            | 4.5                                |
| C4orf47   | Chromosome 4 open reading frame 47                | 4.5                                |
| KISS1R    | KISS1 receptor                                    | 4.5                                |
| NSA2      | NSA2, ribosome biogenesis homolog                 | 4.4                                |
| HIST1H3C  | Histone cluster 1 H3 family member c              | 4.0                                |
| SEC11C    | SEC11 homolog C, signal peptidase complex subunit | 3.9                                |
| KPNA7     | Karyopherin subunit alpha 7                       | 3.8                                |
| CASP14    | Caspase 14                                        | 3.7                                |
| SLC2A3    | Solute carrier family 2 member 3                  | 3.7                                |
| ALDOC     | Aldolase, fructose-bisphosphate C                 | 3.7                                |
| MT1B      | Metallothionein 1B                                | 3.6                                |
| SERPINE1  | Serpin family E member 1                          | 3.6                                |
| MAF       | MAF bzip transcription factor                     | 3.5                                |
| CA9       | Carbonic anhydrase 9                              | 3.4                                |
| TGM2      | Transglutaminase 2                                | 3.4                                |
| PADI1     | Peptidyl arginine deiminase 1                     | 3.3                                |
| STC1      | Stanniocalcin 1                                   | 3.1                                |
| BNIP3     | BCL2 interacting protein 3                        | 3.1                                |
| LSS       | Lanosterol synthase                               | 3.1                                |
| MT1H      | Metallothionein 1H                                | 3.1                                |
| MT1JP     | Metallothionein 1J, pseudogene                    | 3.0                                |
| MYH16     | Myosin heavy chain 16 pseudogene                  | 3.0                                |
| MT1X      | Metallothionein 1X                                | 3.0                                |
| PLA2G2F   | Phospholipase A2 group IIF                        | 3.0                                |

|                   |                                                        |     |
|-------------------|--------------------------------------------------------|-----|
| CALB1             | Calbindin 1                                            | 2.9 |
| KRT42P            | Keratin 42 pseudogene                                  | 2.9 |
| ENO2              | Enolase 2                                              | 2.9 |
| ZFP90             | ZFP90 zinc finger protein                              | 2.9 |
| VEZT              | Vezatin, adherens junctions transmembrane protein      | 2.9 |
| CSF2              | Colony stimulating factor 2                            | 2.9 |
| MT1L              | Metallothionein 1L, pseudogene                         | 2.8 |
| CCNG1             | Cyclin G1                                              | 2.8 |
| AKR1C1            | Aldo-keto reductase family 1 member C1                 | 2.8 |
| RGCC              | Regulator of cell cycle                                | 2.8 |
| WFDC3             | WAP four-disulfide core domain 3                       | 2.8 |
| KRT17P5           | Keratin 17 pseudogene 5                                | 2.8 |
| C20orf195(FNDC11) | Fibronectin type III domain containing 11              | 2.7 |
| PFKFB4            | 6-phosphofructo-2-kinase/fructose-2,6-biphosphatase 4  | 2.7 |
| WISP2             | WNT1 inducible signaling pathway protein 2             | 2.7 |
| SNRPD2P2          | Small nuclear ribonucleoprotein D2 pseudogene 2        | 2.6 |
| FZD10             | Frizzled class receptor 10                             | 2.6 |
| KCTD11            | Potassium channel tetramerization domain containing 11 | 2.6 |
| CLIC3             | Chloride intracellular channel 3                       | 2.6 |
| EFNA1             | Ephrin A1                                              | 2.5 |
| MTRNR2L8          | MT-RNR2-like 8                                         | 2.5 |
| WIP1              | WD repeat domain, phosphoinositide interacting         | 2.5 |
| RPL17             | Ribosomal protein L17                                  | 2.4 |
| ITGA5             | Integrin subunit alpha 5                               | 2.4 |
| RPLP1             | Ribosomal protein lateral stalk subunit P1             | 2.4 |
| KIAA1755          | Kiaa1755                                               | 2.4 |
| AKR1C4            | Aldo-keto reductase family 1 member C4                 | 2.4 |
| LOXL2             | Lysyl oxidase like 2                                   | 2.3 |
| ABCA3             | ATP binding cassette subfamily A member 3              | 2.3 |

|          |                                                           |     |
|----------|-----------------------------------------------------------|-----|
| MT1A     | Metallothionein 1 <sup>a</sup>                            | 2.3 |
| RPS27    | Ribosomal protein S27                                     | 2.3 |
| SLC11A1  | Natural resistance-associated macrophage protein 1        | 2.3 |
| RAB11A   | RAB11A, member RAS oncogene family                        | 2.3 |
| MTRNR2L5 | MT-RNR2-like 5                                            | 2.3 |
| RNASE7   | Ribonuclease 7                                            | 2.3 |
| DDIT4    | DNA damage inducible transcript 4                         | 2.2 |
| RASSF7   | Ras association domain family member 7                    | 2.2 |
| TBCA     | Tubulin folding cofactor A                                | 2.2 |
| TXN      | Thioredoxin                                               | 2.2 |
| INSIG1   | Insulin induced gene 1                                    | 2.2 |
| RPS29    | Ribosomal protein S29                                     | 2.2 |
| CRIP1    | Cysteine rich protein 1                                   | 2.2 |
| MT2A     | Metallothionein 2A                                        | 2.2 |
| SEPT8    | Septin 8                                                  | 2.2 |
| GJB4     | Gap junction protein beta 4                               | 2.2 |
| RPSAP52  | Ribosomal protein SA pseudogene                           | 2.1 |
| APOBEC3G | Apolipoprotein B mRNA editing enzyme catalytic subunit 3G | 2.1 |
| EGLN3    | Egl-9 family hypoxia inducible factor 3                   | 2.1 |
| AGBL5    | ATP/GTP binding protein like 5                            | 2.1 |
| MTRNR2L6 | MT-RNR2-like 6                                            | 2.1 |
| TCAF2    | TRPM8 channel associated factor 2                         | 2.1 |
| MRPS18A  | Mitochondrial ribosomal protein                           | 2.1 |
| FTMT     | Ferritin mitochondrial                                    | 2.1 |
| EMP3     | Epithelial membrane protein 3                             | 2.1 |
| S100P    | S100 calcium binding protein P                            | 2.1 |
| KRT84    | Keratin 84                                                | 2.1 |
| MMP9     | Matrix metalloproteinase 9                                | 2.1 |
| ALG5     | Dolichyl-phosphate beta-glucosyltransferase               | 2.1 |

|          |                                                                               |     |
|----------|-------------------------------------------------------------------------------|-----|
| PAG1     | Phosphoprotein membrane anchor with glycosphingolipid microdomains 1          | 2.1 |
| TINF2    | TERF1 interacting nuclear factor 2                                            | 2.0 |
| RPS21    | Ribosomal protein S21                                                         | 2.0 |
| NENF     | Neudesin neurotrophic factor                                                  | 2.0 |
| BNIP3L   | BCL2 interacting protein 3 like                                               | 2.0 |
| SMS      | Spermine synthase                                                             | 2.0 |
| KRT16P3  | Keratin 16 pseudogene 3                                                       | 2.0 |
| CDA      | Cytidine deaminase                                                            | 2.0 |
| PPIAL4G  | Peptidylprolyl isomerase A like 4G                                            | 2.0 |
| SHROOM4  | Shroom family member 4                                                        | 2.0 |
| MTRNR2L4 | MT-RNR2-like 4                                                                | 2.0 |
| LAMC2    | Laminin subunit gamma 2                                                       | 2.0 |
| OSGIN1   | Oxidative stress induced growth inhibitor                                     | 2.0 |
| SEN6     | SUMO1/sentrin specific peptidase 6                                            | 2.0 |
| ATP5I    | ATP synthase, H <sup>+</sup> transporting, mitochondrial Fo complex subunit E | 2.0 |
| IGFL1    | IGF like family member 1                                                      | 1.9 |
| AMY2B    | Amylase, alpha 2B (pancreatic)                                                | 1.9 |
| RPS18    | Ribosomal protein S18                                                         | 1.9 |
| HK2      | Hexokinase 2                                                                  | 1.9 |
| ANKRD37  | Ankyrin repeat domain 37                                                      | 1.9 |
| SUMO2    | Small ubiquitin-like modifier 2                                               | 1.9 |
| FAM83A   | Family with sequence similarity 83 member A                                   | 1.9 |
| JUN      | Jun proto-oncogene, AP-1 transcription factor subunit                         | 1.9 |
| BHLHE40  | Basic helix-loop-helix family member 40                                       | 1.9 |
| ADAM19   | ADAM metallopeptidase domain 19                                               | 1.9 |
| TMC8     | Transmembrane channel like 8                                                  | 1.8 |
| MSC      | Musculin                                                                      | 1.8 |
| RPL12    | Ribosomal protein L12                                                         | 1.8 |
| HBEGF    | Heparin binding EGF like growth factor                                        | 1.8 |

|            |                                                      |     |
|------------|------------------------------------------------------|-----|
| ARNT2      | Aryl hydrocarbon receptor nuclear translocator 2     | 1.8 |
| PPP2R5B    | Protein phosphatase 2 regulatory subunit b'beta      | 1.8 |
| RNF181     | Ring finger protein 181                              | 1.8 |
| BRMS1      | Breast cancer metastasis suppressor 1                | 1.8 |
| CDK7       | Cyclin dependent kinase 7                            | 1.8 |
| FTH1P3     | Ferritin heavy chain 1 pseudogene 3                  | 1.8 |
| EIF3L      | Eukaryotic translation initiation factor 3 subunit L | 1.8 |
| LBH        | Limb bud and heart development                       | 1.8 |
| FGFBP1     | Fibroblast growth factor binding protein 1           | 1.8 |
| CYP1A1     | Cytochrome P450 family 1 subfamily A member 1        | 1.8 |
| ADM        | Adrenomedullin                                       | 1.8 |
| RPS12      | Ribosomal protein S12                                | 1.7 |
| NHP2       | NHP2 ribonucleoprotein                               | 1.7 |
| RPS28      | Ribosomal protein S28                                | 1.7 |
| RPL10      | Ribosomal protein L10                                | 1.7 |
| MVD        | Mevalonate diphosphate decarboxylase                 | 1.7 |
| RGS20      | Regulator of G-protein signaling 20                  | 1.7 |
| EXOSC10    | Exosome component 10                                 | 1.7 |
| RPL37A     | Ribosomal protein L37A                               | 1.7 |
| SYNGR3     | Synaptogyrin 3                                       | 1.7 |
| RPL39      | Ribosomal protein L39                                | 1.7 |
| MTRNR2L9   | MT-RNR2-like 9                                       | 1.7 |
| DAPK2      | Death associated protein kinase 2                    | 1.7 |
| RPL23      | Ribosomal protein L23                                | 1.7 |
| AKR1B10    | Aldo-keto reductase family 1 member B10              | 1.7 |
| CHMP5      | Charged multivesicular body protein 5                | 1.7 |
| RPS19      | Ribosomal protein S19                                | 1.7 |
| FAM83A-AS1 | FAM83A antisense RNA 1                               | 1.7 |
| RPS16      | Ribosomal protein S16                                | 1.6 |

|             |                                                                               |     |
|-------------|-------------------------------------------------------------------------------|-----|
| FAM162A     | Family with sequence similarity 162 member A                                  | 1.6 |
| ATP5H       | ATP synthase, H <sup>+</sup> transporting, mitochondrial Fo complex subunit D | 1.6 |
| RPS7        | Ribosomal protein S7                                                          | 1.6 |
| CT62        | Cancer/testis antigen 62                                                      | 1.6 |
| HMOX1       | Heme oxygenase 1                                                              | 1.6 |
| PNRC1       | Proline rich nuclear receptor coactivator 1                                   | 1.6 |
| GOLGA7B     | Golgin A7 family member B                                                     | 1.6 |
| LOC344887   | NmrA like redox sensor 2, pseudogene                                          | 1.6 |
| WDR54       | WD repeat domain 54                                                           | 1.6 |
| PGK1        | Phosphoglycerate kinase 1                                                     | 1.6 |
| INSIG2      | Insulin induced gene 2                                                        | 1.6 |
| APCDD1L-AS1 | APCDD1L antisense RNA 1 (head to head)                                        | 1.6 |
| TMBIM1      | Transmembrane BAX inhibitor motif containing 1                                | 1.6 |
| RAB2A       | RAB2A, member RAS oncogene family                                             | 1.6 |
| TMEM45A     | Transmembrane protein 45 <sup>a</sup>                                         | 1.6 |
| FAM214B     | Family with sequence similarity 214 member B                                  | 1.6 |
| CASC8       | Cancer susceptibility 8 (non-protein coding)                                  | 1.6 |
| RPL24       | Ribosomal protein L24                                                         | 1.6 |
| MMD         | Monocyte to macrophage differentiation associated                             | 1.6 |
| DUSP5       | Dual specificity phosphatase 5                                                | 1.6 |
| LGALS1      | Galectin 1                                                                    | 1.6 |
| MMP28       | Matrix metalloproteinase 28                                                   | 1.6 |
| SNHG5       | Small nucleolar RNA host gene 5                                               | 1.6 |
| RPL19       | Ribosomal protein L19                                                         | 1.6 |
| PRSS22      | Protease, serine 22                                                           | 1.6 |
| JAZF1       | JAZF zinc finger 1                                                            | 1.5 |
| EFNA3       | Ephrin A3                                                                     | 1.5 |
| RPS25       | Ribosomal protein S25                                                         | 1.5 |
| IER3        | Immediate early response 3                                                    | 1.5 |

|          |                                                       |     |
|----------|-------------------------------------------------------|-----|
| BIK      | BCL2 interacting killer                               | 1.5 |
| ERO1A    | Endoplasmic reticulum oxidoreductase 1 alpha          | 1.5 |
| TP53INP2 | Tumor protein p53 inducible nuclear protein 2         | 1.5 |
| RPL35A   | Ribosomal protein l35a                                | 1.5 |
| RRAS     | Related RAS viral (r-ras) oncogene homolog            | 1.5 |
| GBAS     | Nipsnap homolog 2                                     | 1.5 |
| KIF3C    | Kinesin family member 3C                              | 1.5 |
| IDI1     | Isopentenyl-diphosphate delta isomerase 1             | 1.5 |
| RPL27A   | Ribosomal protein l27 A                               | 1.5 |
| TMEM120A | Transmembrane protein 120A                            | 1.5 |
| PPIH     | Peptidylprolyl isomerase H                            | 1.5 |
| VKORC1   | Vitamin K epoxide reductase complex subunit 1         | 1.5 |
| RPS11    | Ribosomal protein S11                                 | 1.5 |
| RTN4R    | Reticulon 4 receptor                                  | 1.5 |
| RPLP2    | Ribosomal protein lateral stalk subunit P2            | 1.5 |
| WNT7A    | Wnt family member 7A                                  | 1.5 |
| CYP27B1  | Cytochrome P450 family 27 subfamily B member 1        | 1.5 |
| RPL18A   | Ribosomal protein l18a                                | 1.5 |
| PSMB3    | Proteasome subunit beta 3                             | 1.5 |
| RPL5     | Ribosomal protein L5                                  | 1.5 |
| HAS2     | Hyaluronan synthase 2                                 | 1.5 |
| ACTG1P17 | Actin gamma 1 pseudogene 17                           | 1.5 |
| FNTA     | Farnesyltransferase, CAAX box, alpha                  | 1.4 |
| MUC13    | Mucin 13, cell surface associated                     | 1.4 |
| IGIP     | Iga inducing protein                                  | 1.4 |
| FOS      | Fos proto-oncogene, AP-1 transcription factor subunit | 1.4 |
| BTG1     | BTG anti-proliferation factor 1                       | 1.4 |
| SNHG6    | Small nucleolar RNA host gene 6                       | 1.4 |
| GAS5     | Growth arrest specific 5 (non-protein coding)         | 1.4 |

|            |                                                                |      |
|------------|----------------------------------------------------------------|------|
| RPL30      | Ribosomal protein L30                                          | 1.4  |
| MICALCL    | MICAL C-terminal like                                          | 1.4  |
| PPP2R5C    | Protein phosphatase 2 regulatory subunit b'gamma               | 1.4  |
| RPS8       | Ribosomal protein S8                                           | 1.4  |
| RPL35      | Ribosomal protein L35                                          | 1.4  |
| RPL13AP20  | Ribosomal protein L13a pseudogene 20                           | 1.4  |
| PPP5C      | Protein phosphatase 5 catalytic subunit                        | 1.4  |
| HMGN2P46   | High mobility group nucleosomal binding domain 2 pseudogene 46 | 1.4  |
| RPL7A      | Ribosomal protein l7A                                          | 1.4  |
| RPL26      | Ribosomal protein L26                                          | 1.3  |
| RPS4X      | Ribosomal protein S4, X-linked                                 | 1.3  |
| RPS13      | Ribosomal protein S13                                          | 1.3  |
| RPL27      | Ribosomal protein L27                                          | 1.3  |
| RPS6       | Ribosomal protein S6                                           | 1.3  |
| RPL37      | Ribosomal protein L37                                          | 1.3  |
| PSMB2      | Proteasome subunit beta 2                                      | 1.3  |
| COX7B      | Cytochrome c oxidase subunit 7B                                | 1.3  |
| RPL3       | Ribosomal protein L3                                           | 1.3  |
| EIF3E      | Eukaryotic translation initiation factor 3 subunit E           | 1.2  |
| UBB        | Ubiquitin B                                                    | 1.2  |
| RPS3A      | Ribosomal protein S3A                                          | 1.2  |
| RPL7       | Ribosomal protein L7                                           | 1.2  |
| POTEI      | POTE ankyrin domain family member I                            | 1.2  |
| POTEM      | POTE ankyrin domain family member                              | -5.3 |
| SNORA51    | Small nucleolar RNA, H/ACA box                                 | -4.9 |
| ANP32A-IT1 | ANP32A intronic transcript 1                                   | -4.6 |
| UCKL1      | Uridine-cytidine kinase 1 like 1                               | -4.5 |
| FNDC3B     | Fibronectin type III domain containing                         | -4.4 |
| LOC729739  | Peptidylprolyl isomerase A (cyclophilin A) pseudogene          | -4.3 |



|            |                                                                                  |      |
|------------|----------------------------------------------------------------------------------|------|
| RPL23AP64  | Ribosomal protein L23a pseudogene                                                | -4.2 |
| KRT1       | Keratin 1                                                                        | -4.0 |
| FDPSP2     | Farnesyl diphosphate synthase pseudogene 2                                       | -3.2 |
| MMP12      | Matrix metalloproteinase 12                                                      | -3.2 |
| NSD1       | Nuclear receptor binding SET domain                                              | -3.1 |
| CYCSP52    | Cytochrome c, somatic pseudogene                                                 | -3.0 |
| EME2       | Essential meiotic structure-specific endonuclease subunit 2                      | -3.0 |
| COL12A1    | Collagen type XII alpha 1 chain                                                  | -2.9 |
| RPL23AP32  | Ribosomal protein L23a pseudogene                                                | -2.9 |
| HSP90AB4P  | Heat shock protein 90 alpha family class B member 4, pseudogene                  | -2.8 |
| SNORD45A   | Small nucleolar RNA, C/D box                                                     | -2.8 |
| FBXL19-AS1 | FBXL19 antisense RNA 1 (head to head)                                            | -2.8 |
| TRIM26     | Tripartite motif containing 26                                                   | -2.8 |
| IARS       | Isoleucyl-tRNA synthetase                                                        | -2.8 |
| KIF14      | Kinesin family member 14                                                         | -2.7 |
| IFITM4P    | Interferon induced transmembrane protein 4 pseudogene                            | -2.7 |
| MEGF8      | Multiple EGF like domains 8                                                      | -2.7 |
| HNRNPL     | Heterogeneous nuclear ribonucleoprotein                                          | -2.7 |
| SPTBN5     | Spectrin beta, non-erythrocytic 5                                                | -2.7 |
| SOX2       | SRX-box 2                                                                        | -2.6 |
| KIAA0586   | Kiaa0586                                                                         | -2.6 |
| RBP5       | Retinol binding protein 5                                                        | -2.6 |
| AGRN       | Agrin                                                                            | -2.6 |
| CAD        | Carbamoyl-phosphate synthetase 2, aspartate transcarbamylase, and dihydroorotase | -2.5 |
| C9orf172   | Chromosome 9 open reading frame                                                  | -2.5 |
| ANKRD30BL  | Ankyrin repeat domain 30B like                                                   | -2.4 |
| ITPRIPL2   | Inositol 1,4,5-trisphosphate receptor interacting protein like 2                 | -2.4 |
| SMC4       | Structural maintenance of chromosomes 4                                          | -2.4 |
| MKI67      | Marker of proliferation Ki-67                                                    | -2.4 |

|              |                                                             |      |
|--------------|-------------------------------------------------------------|------|
| EIF5A        | Eukaryotic translation initiation factor 5A                 | -2.4 |
| LMNB1        | Lamin B1                                                    | -2.3 |
| DNAH11       | Dynein axonemal heavy chain 11                              | -2.3 |
| EIF5         | Eukaryotic translation initiation factor 5                  | -2.3 |
| MSH2         | Muts homolog 2                                              | -2.2 |
| SREK1        | Splicing regulatory glutamic acid and lysine rich protein 1 | -2.2 |
| IGSF9B       | Immunoglobulin superfamily member 9B                        | -2.2 |
| UGT8         | UDP glycosyltransferase 8                                   | -2.2 |
| PWAR5        | Prader Willi/Angelman region RNA 5                          | -2.2 |
| C1RL-AS1     | C1RL antisense RNA 1                                        | -2.1 |
| UCKL1-AS1    | UCKL1 antisense RNA 1                                       | -2.1 |
| ACTG1P4      | Actin gamma 1 pseudogene 4                                  | -2.1 |
| TNPO2        | Transportin 2                                               | -2.1 |
| PUS1         | Pseudouridylate synthase 1                                  | -2.1 |
| LOC100130331 | POTE ankyrin domain family, member F                        | -2.1 |
| RACGAP1P     | Rac gtpase activating protein 1                             | -2.1 |
| NAT10        | N-acetyltransferase 10                                      | -2.1 |
| ECT2         | Epithelial cell transforming 2                              | -2.0 |
| SLC25A2      | Solute carrier family 25 member 2                           | -2.0 |
| MGA          | MGA, MAX dimerization protein                               | -2.0 |
| UBA1         | Ubiquitin like modifier activating enzyme 1                 | -2.0 |
| POTEF        | POTE ankyrin domain family member F                         | -2.0 |
| SDPR         | Caveolae associated protein 2(cavin2)                       | -2.0 |
| SVIL         | Supervillin                                                 | -2.0 |
| TAF1L        | TATA-box binding protein associated factor 1 like           | -2.0 |
| C5orf17      | Chromosome 5 open reading frame 17                          | -1.9 |
| TFAMP1       | Transcription factor A, mitochondrial pseudogene 1          | -1.9 |
| EWSR1        | EWS RNA binding protein 1                                   | -1.9 |
| CPD          | Carboxypeptidase D                                          | -1.9 |

|              |                                                                                 |      |
|--------------|---------------------------------------------------------------------------------|------|
| ANP32D       | Acidic nuclear phosphoprotein 32 family member                                  | -1.9 |
| LOC374443    | C-type lectin domain family 2 member D pseudogene                               | -1.9 |
| KIF4B        | Kinesin family member 4B                                                        | -1.9 |
| ZNF106       | Zinc finger protein 106                                                         | -1.9 |
| FLG          | Fillagrin                                                                       | -1.9 |
| ZFHX3        | Zinc finger homeobox 3                                                          | -1.8 |
| ZNF138       | Zinc finger protein 138                                                         | -1.8 |
| LOC100288842 | UDP-glcnaac:betagal beta-1,3-N-acetylglucosaminyltransferase 5 pseudogene       | -1.8 |
| E2F3         | E2F transcription factor 3                                                      | -1.8 |
| HERC5        | HECT and RLD domain containing E3 ubiquitin protein ligase 5                    | -1.8 |
| TMEM5-AS1    | TMEM5 antisense RNA 1                                                           | -1.8 |
| NAP1L2       | Nucleosome assembly protein 1 like 2                                            | -1.8 |
| XRCC6P5      | X-ray repair cross complementing 6 pseudogene                                   | -1.8 |
| KPNB1        | Karyopherin subunit beta 1                                                      | -1.8 |
| DPYSL3       | Dihydropyrimidinase like 3                                                      | -1.8 |
| NEAT1        | Nuclear paraspeckle assembly transcript 1 (non-protein coding)                  | -1.8 |
| AURKAPS1     | Aurora kinase A pseudogene 1                                                    | -1.7 |
| ANKRD36BP1   | Ankyrin repeat domain 36B pseudogene 1                                          | -1.7 |
| KIAA0754     | Kiaa0754                                                                        | -1.7 |
| METTL7A      | Methyltransferase like 7A                                                       | -1.7 |
| SAMHD1       | SAM and HD domain containing deoxynucleoside triphosphate triphosphohydrolase 1 | -1.7 |
| PIK3R1       | Phosphoinositide-3-kinase regulatory subunit 1                                  | -1.7 |
| PRPS1L1      | Phosphoribosyl pyrophosphate synthetase 1-like 1                                | -1.7 |
| STAG3L2      | Stromal antigen 3-like 2 (pseudogene)                                           | -1.7 |
| MMP13        | Matrix metalloproteinase 13                                                     | -1.7 |
| ASPM         | Abnormal spindle microtubule assembly                                           | -1.7 |
| CHD8         | Chromodomain helicase DNA binding protein 8                                     | -1.7 |
| SFT2D2       | SFT2 domain containing 2                                                        | -1.7 |
| FAM72C       | Family with sequence similarity 72 member C                                     | -1.7 |

|           |                                                                  |      |
|-----------|------------------------------------------------------------------|------|
| DDX21     | Dexd-box helicase 21                                             | -1.6 |
| CCDC144B  | Coiled-coil domain containing 144B (pseudogene)                  | -1.6 |
| NCR3LG1   | Natural killer cell cytotoxicity receptor 3 ligand 1             | -1.6 |
| HELZ2     | Helicase with zinc finger 2                                      | -1.6 |
| RSAD2     | Radical S-adenosyl methionine domain containing 2                | -1.6 |
| BMS1P6    | BMS1, ribosome biogenesis factor pseudogene 6                    | -1.6 |
| ANAPC5    | Anaphase promoting complex subunit 5                             | -1.6 |
| JRK       | Jrk helix-turn-helix protein                                     | -1.6 |
| USP1      | Ubiquitin specific peptidase 1                                   | -1.6 |
| TRANK1    | Tetratricopeptide repeat and ankyrin repeat containing 1         | -1.6 |
| NEU3      | Neuraminidase 3                                                  | -1.6 |
| OASL      | 2'-5'-oligoadenylate synthetase like                             | -1.6 |
| SLC25A24  | Solute carrier family 25 member 24                               | -1.5 |
| GBP4      | Guanylate binding protein 4                                      | -1.5 |
| CSMD3     | CUB and Sushi multiple domains 3                                 | -1.5 |
| MFN2      | Mitofusin 2                                                      | -1.5 |
| MUC4      | Mucin 4, cell surface associated                                 | -1.5 |
| POLR1A    | RNA polymerase I subunit A                                       | -1.5 |
| TRPV6     | Transient receptor potential cation channel subfamily V member 6 | -1.5 |
| UBA5      | Ubiquitin like modifier activating enzyme 5                      | -1.5 |
| TRIM66    | Tripartite motif containing 66                                   | -1.5 |
| LOC494127 | NFYC pseudogene                                                  | -1.5 |
| LOC728024 | Chromosome X open reading frame 56 pseudogene                    | -1.4 |
| MIA3      | MIA family member 3, ER export factor                            | -1.4 |
| LOC401127 | WD repeat domain 5 pseudogene                                    | -1.4 |
| LOC341056 | SUMO1 activating enzyme subunit 1 pseudogene                     | -1.4 |
| PANDAR    | Promoter of CDKN1A antisense DNA damage activated RNA            | -1.4 |
| DCAF13P3  | DDB1 and CUL4 associated factor 13 pseudogene 3                  | -1.4 |

---
