# Supplementary material for: Dual RNA-Seq Analysis of Trichophyton rubrum and HaCat Keratinocyte Co-Culture Highlights Important Genes for Fungal-Host Interaction
Source: MDPI journal article supplement (doi:10.3390/genes9070362), 2018-07-19
Supplement: s1 [file s1]

**Supplementary Table S4.** Primers used for qPCR analysis.

| <b>ID</b>  | <b>Gene product name</b>                           | <b>Primer sequence (5' - 3')</b>                      | <b>Fragment</b> | <b>Reference</b>        |
|------------|----------------------------------------------------|-------------------------------------------------------|-----------------|-------------------------|
| TERG_12606 | Dipeptidyl peptidase V                             | F:CGGTTTCGATAAGAACAAGGTC<br>R:ACAACGTATCCCTGGTCAG     | 126 bp          | This paper              |
| TERG_03102 | Sterol 24-C-methyltransferase                      | F:CTCTGGCAAGACACGAACAC<br>R:CCTTGCAGCCGGTGAAGG        | 126 bp          | Bitencourt et al., 2013 |
| TERG_01281 | Malate synthase                                    | F: CCTAACCAACTCTTTGTCCGAC<br>R: GAAGCCATCCCTCCATGTAAG | 142 bp          | Cantelli et al., 2017   |
| TERG_08405 | Leucine aminopeptidase 2                           | F:GCTGCACAAGGTCAAGTTG<br>R:ACTTCTCGAACAGGTACTCG       | 158 bp          | This paper              |
| TERG_00916 | Carboxylic acid transporter                        | F:CGCATTGGGTATCATGATCAC<br>R:GCTCTTGTTACCGTCATG       | 109 bp          | This paper              |
| TERG_11638 | Isocitrate lyase                                   | F:ACAACCTCTCGCCTTCATTC<br>R:GGTCAGATATCAGGGCAGTTG     | 144 bp          | Komoto et al., 2015     |
| TERG_07904 | Tubulin beta chain                                 | F:AACATGATGGCTGCCACTGA<br>R:AAGATGGCAGAGCAGGTAAGGT    | 253 bp          | Jacob et al., 2012      |
| TERG08193  | 18S                                                | F:CGCTGGCTTCTTAGAGGGACTAT<br>R:TGCCTCAAACCTCCATCGACTT | 51 bp           | Bitencourt et al., 2013 |
| CASP14     | Caspase-14                                         | F:CATCAAAGACAGCCCACAAAC<br>R:TGTCCTTTCCTCTTCGTGAAC    | 150 bp          | This paper              |
| CSF2       | Granulocyte-macrophage colony-stimulating factor   | F:TCTGCTTGTCATCCCCTTTG<br>R:ATGACCATCCTGAGTTTCTAGC    | 122 bp          | Kim et al., 2016        |
| RNASE7     | Ribonuclease 7                                     | F:GGAGTCACAGCACGAAGACCA<br>R:CATGGCTGAGTTGCATGCTTGA   | 235 bp          | Köten et al., 2009      |
| SLC11A1    | Natural resistance-associated macrophage protein 1 | F:CATCTCCGTCTCCCAAAGTG<br>R:TGGATGCTTTAGAGACTTCGTG    | 144 bp          | This paper              |

|       |                                          |                                                      |        |                            |
|-------|------------------------------------------|------------------------------------------------------|--------|----------------------------|
| MMP9  | Matrix metalloproteinase 9               | F:CAGTTTCCATTTCATCTTCCAAGG<br>R:CATCACCGTCGAGTCAGC   | 150 bp | Markiewicz et al.,<br>2006 |
| HAS2  | Hyaluronan synthase 2                    | F:TCCGAGAATGGCTGTACAATG<br>R:AAGAGCTGGATTACTGTGGC    | 118 bp | This paper                 |
| KRT1  | Keratin type II cytoskeletal 1           | F:CCTTACAGCACTCTACCAAGC<br>R:TCTGGGCTATATCCTCGTACTG  | 149 bp | This paper                 |
| FLG   | Filaggrin                                | F:AGCAATCGGTAAATAGGTCTGG<br>R:CCTCATTTTCGTGTTTGTCTGC | 126 bp | This paper                 |
| GAPDH | Glyceraldehyde-3-phosphate dehydrogenase | F:AATCCCATCACCATCTTCCAG<br>R:GAGCCCCAGCCTTCTCCAT     | 118 bp | Ma et al., 2015            |
| ACTB  | Beta-actin                               | F:GTTGCGTTACACCCTTTCTTG<br>R:TGCTGTCACCTTCACCGTTC    | 154 bp | Dai et al., 2012           |

---
