# Supplementary material for: Dual RNA-Seq Analysis of Trichophyton rubrum and HaCat Keratinocyte Co-Culture Highlights Important Genes for Fungal-Host Interaction
Source: MDPI journal article supplement (doi:10.3390/genes9070362), 2018-07-19
Supplement: s1 [file s1]

**Supplementary Table S3.** Complete list of genes differentially expressed in *T. rubrum* after 24 h of co-culture.

| <b>ID</b>  | <b>Gene product name</b>                | <b>Log<sub>2</sub> fold change</b> |
|------------|-----------------------------------------|------------------------------------|
| TERG_12606 | Dipeptidylpeptidase V (DPPV)            | 2.2                                |
| TERG_01280 | Hypothetical protein                    | 2.1                                |
| TERG_03102 | Sterol 24-C-methyltransferase- ERG6     | 2.1                                |
| TERG_08104 | Potassium/sodium efflux P-type ATPase   | 2.0                                |
| TERG_01281 | Malate synthase                         | 1.7                                |
| TERG_04399 | Phthalate transporter                   | 1.6                                |
| TERG_00348 | Galactose-proton symporter              | 1.4                                |
| TERG_02811 | Hypothetical protein                    | 1.4                                |
| TERG_12645 | Hypothetical protein                    | 1.3                                |
| TERG_07017 | Oxidoreductase                          | 1.3                                |
| TERG_08333 | 1-pyrroline-5-carboxylate dehydrogenase | 1.3                                |
| TERG_02671 | Hypothetical protein                    | 1.3                                |
| TERG_02023 | Extracellular matrix protein            | 1.3                                |
| TERG_08405 | Leucine aminopeptidase 2                | 1.3                                |
| TERG_00916 | Carboxylic acid transporter             | 1.3                                |
| TERG_11638 | Isocitrate lyase                        | 1.3                                |
| TERG_04952 | ABC transporter                         | 1.2                                |
| TERG_08286 | Hypothetical protein                    | 1.2                                |
| TERG_03712 | Hypothetical protein                    | 1.1                                |
| TERG_11639 | Isocitrate lyase                        | 1.1                                |
| TERG_01270 | AMP dependent ligase                    | 1.1                                |
| TERG_07691 | Nonspecific lipid-transfer protein      | 1.1                                |
| TERG_07783 | Oligopeptide transporter                | 1.1                                |
| TERG_02186 | ABC transporter                         | 1.1                                |
| TERG_04356 | Amino acid permease                     | 1.1                                |
| TERG_04580 | NADP-specific glutamate dehydrogenase   | 1.0                                |

|            |                                                       |      |
|------------|-------------------------------------------------------|------|
| TERG_01406 | Hypothetical protein                                  | -2.9 |
| TERG_07726 | Hypothetical protein                                  | -2.2 |
| TERG_03174 | MFS siderochrome iron transporter                     | -2.0 |
| TERG_06355 | Hypothetical protein                                  | -1.9 |
| TERG_07035 | Hypothetical protein                                  | -1.8 |
| TERG_04156 | Hypothetical protein                                  | -1.8 |
| TERG_05655 | AN1 zinc finger protein                               | -1.7 |
| TERG_01622 | Hypothetical protein                                  | -1.6 |
| TERG_07477 | Hypothetical protein                                  | -1.6 |
| TERG_06186 | Protein disulfide-isomerase domain-containing protein | -1.6 |
| TERG_03708 | Hypothetical protein                                  | -1.5 |
| TERG_03855 | Hypothetical protein                                  | -1.5 |
| TERG_00499 | Hypothetical protein                                  | -1.4 |
| TERG_03175 | Hypothetical protein                                  | -1.4 |
| TERG_04073 | Glutathione synthetase                                | -1.4 |
| TERG_125   | Hypothetical protein                                  | -1.4 |
| TERG_08139 | NAD dependent epimerase/dehydratase                   | -1.3 |
| TERG_06963 | Hsp90-like protein                                    | -1.3 |
| TERG_01731 | Hypothetical protein                                  | -1.3 |
| TERG_03340 | Oxidoreductase                                        | -1.3 |
| TERG_01659 | Hypothetical protein                                  | -1.3 |
| TERG_04863 | Hypothetical protein                                  | -1.3 |
| TERG_01988 | Hypothetical protein                                  | -1.2 |
| TERG_12510 | Hypothetical protein                                  | -1.2 |
| TERG_07949 | Heat shock protein 78                                 | -1.2 |
| TERG_04043 | Hypothetical protein                                  | -1.2 |
| TERG_11780 | Hypothetical protein                                  | -1.2 |
| TERG_00175 | Hypothetical protein                                  | -1.2 |
| TERG_02278 | Hypothetical protein                                  | -1.2 |

|            |                              |      |
|------------|------------------------------|------|
| TERG_05575 | MFS multidrug transporter    | -1.1 |
| TERG_06315 | Hypothetical protein         | -1.1 |
| TERG_07083 | Hypothetical protein         | -1.1 |
| TERG_03070 | Hypothetical protein         | -1.0 |
| TERG_07364 | Hypothetical protein         | -1.0 |
| TERG_04966 | Hypothetical protein         | -1.0 |
| TERG_00070 | Maleylacetoacetate isomerase | -1.0 |

---
